# Supplementary material
Source: publisher site journal article supplement (https://www.spandidos-publications.com/8429/downloadSupplementary)
Supplement: Supplementary file [file downloadSupplementary]

Table SI. Sensitivity analyses of ANGPTL4 cut-off values for OS and DFS.

| Cut-off values of ANGPTL4 | Cases | 5-year OS (%) | P-value | 5-year DFS (%) | P-value |
|---------------------------|-------|---------------|---------|----------------|---------|
| ≥7.7%                     | 71    | 88.4%         | 0.002   | 82.7%          | <0.001  |
| <7.7%                     | 66    | 61.6%         |         | 52.5%          |         |
| ≥median (8.8%)            | 69    | 85.5%         | 0.003   | 81.2%          | <0.001  |
| <median (8.8%)            | 68    | 64.7%         |         | 54.4%          |         |
| ≥10%                      | 66    | 84.8%         | 0.013   | 80.3%          | 0.004   |
| <10%                      | 71    | 66.2%         |         | 56.3%          |         |
| ≥15%                      | 62    | 83.9%         | 0.045   | 80.6%          | 0.007   |
| <15%                      | 75    | 68.0%         |         | 57.3%          |         |

ANGPTL4, angiotensin-like 4; DFS, disease-free survival; OS, overall survival.

Table SII. Patients' characteristics stratified by p16 status.

| Variables        | p16-positive | p16-negative | P-value |
|------------------|--------------|--------------|---------|
| Overall          | 109          | 28           |         |
| Age              |              |              | 0.189   |
| <65              | 58           | 11           |         |
| ≥65              | 51           | 17           |         |
| Sex              |              |              | 0.333   |
| Male             | 91           | 25           |         |
| Female           | 18           | 3            |         |
| Subsite          |              |              | 0.717   |
| Anterior wall    | 31           | 7            |         |
| Others           | 78           | 21           |         |
| T classification |              |              | 0.935   |
| 1, 2             | 77           | 20           |         |
| 3,4              | 32           | 8            |         |
| N classification |              |              | 0.025   |
| 0                | 24           | 12           |         |
| 1,2,3            | 85           | 16           |         |
| M classification |              |              | 0.632   |
| 0                | 107          | 28           |         |
| 1                | 2            | 0            |         |
| TNM stage        |              |              | <0.001  |
| I, II            | 87           | 11           |         |
| III, IV          | 22           | 17           |         |
| ANGPTL4          |              |              | 0.828   |
| ≥7.7%            | 57           | 14           |         |
| <7.7%            | 52           | 14           |         |

ANGPTL4, angiotensin-like 4.

Table SIII. Prognostic impact of ANGPTL4 expression stratified by p16 status.

|              | ANGPTL4 expression | Cases | 5-year OS (%) | P-value | 5-year DFS (%) | P-value |
|--------------|--------------------|-------|---------------|---------|----------------|---------|
| p16-positive | $\geq 7.7\%$       | 57    | 87.7%         | 0.001   | 82.5%          | 0.002   |
|              | $< 7.7\%$          | 52    | 59.6%         |         | 53.8%          |         |
| p16-negative | $\geq 7.7\%$       | 14    | 78.6%         | 0.796   | 78.6%          | 0.115   |
|              | $< 7.7\%$          | 14    | 78.6%         |         | 50.0%          |         |

ANGPTL4, angiopoietin-like 4; DFS, disease free survival; OS, overall survival.

Table SIV. Multivariate analysis of prognostic factors for OS and DFS in patients underwent definitive therapy: Additional adjustment for p16 status and initial definitive therapy.

| Variables                            | Model 1 (Significant variables in Table II + p16 status) |             |         |       |             |         | Model 2 (Model 1 + initial definitive therapy) |             |         |       |             |         |
|--------------------------------------|----------------------------------------------------------|-------------|---------|-------|-------------|---------|------------------------------------------------|-------------|---------|-------|-------------|---------|
|                                      | OS                                                       |             |         | DFS   |             |         | OS                                             |             |         | DFS   |             |         |
|                                      | HR                                                       | 95% CI      | P-value | HR    | 95% CI      | P-value | HR                                             | 95% CI      | P-value | HR    | 95% CI      | P-value |
| Subsite (Anterior wall)              | -                                                        | -           | -       | 1.806 | 0.900-3.624 | 0.096   | -                                              | -           | -       | 1.806 | 0.899-3.629 | 0.097   |
| T classification (3, 4)              | 2.86                                                     | 1.120-7.301 | 0.028   | 3.300 | 1.447-7.525 | 0.005   | 2.860                                          | 1.120-7.301 | 0.028   | 3.302 | 1.440-7.571 | 0.005   |
| TNM stage (III, IV)                  | 1.029                                                    | 0.360-2.941 | 0.957   | 0.874 | 0.340-2.249 | 0.781   | 1.029                                          | 0.360-2.941 | 1.029   | 0.875 | 0.340-2.252 | 0.781   |
| p16 status (positive)                | 1.128                                                    | 0.404-3.150 | 0.819   | 0.809 | 0.350-1.870 | 0.620   | 1.128                                          | 0.404-3.150 | 0.819   | 0.809 | 0.350-1.871 | 0.620   |
| Initial definitive therapy (surgery) | -                                                        | -           | -       | -     | -           | -       | 1.378                                          | 0.628-3.025 | 0.424   | 1.004 | 0.512-1.969 | 0.990   |
| ANGPTL4 (<7.7%)                      | 3.656                                                    | 1.556-8.588 | 0.003   | 4.012 | 1.847-8.715 | <0.001  | 3.656                                          | 1.556-8.588 | 0.003   | 4.014 | 1.842-8.746 | <0.001  |

Models were restricted to patients who received definitive therapy. Initial definitive therapy was categorized as surgery vs. (chemo)radiation. Because no M1 patients were present in this subset, M classification was not included in these models. ANGPTL4, angiopoietin-like 4; CI, Confidence interval; DFS, Disease free survival; HR, hazard ratio; OS, overall survival.
